# Supplementary material for: Strategy for oxygen vacancy enriched CoMn spinel oxide catalyst activated peroxodisulfate for tetracycline degradation: process, mechanism, and toxicity analysis
Source: Royal Society of Chemistry journal article supplement (doi:10.1039/d3ra00852e), 2023-01-01
Supplement: d3ra00852e1.pdf [file d3ra00852e1.pdf]

## Supporting Information

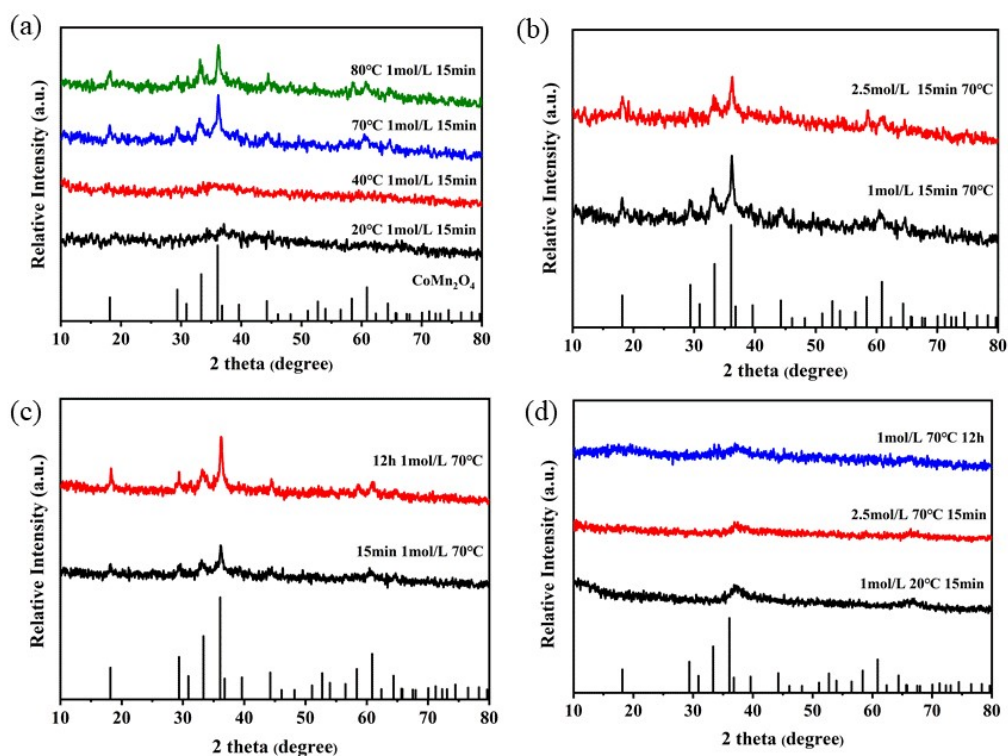

**Fig. S1** TC degradation images of  $\text{CoMn}_2\text{O}_4(\text{P})$  prepared by  $\text{NaBH}_4$  at different conditions: (a) temperature, (b) concentration, (c) time; (d) TC degradation images of  $\text{CoMn}_2\text{O}_4(\text{C})$  prepared by  $\text{NaH}_2\text{PO}_2$  at different conditions.

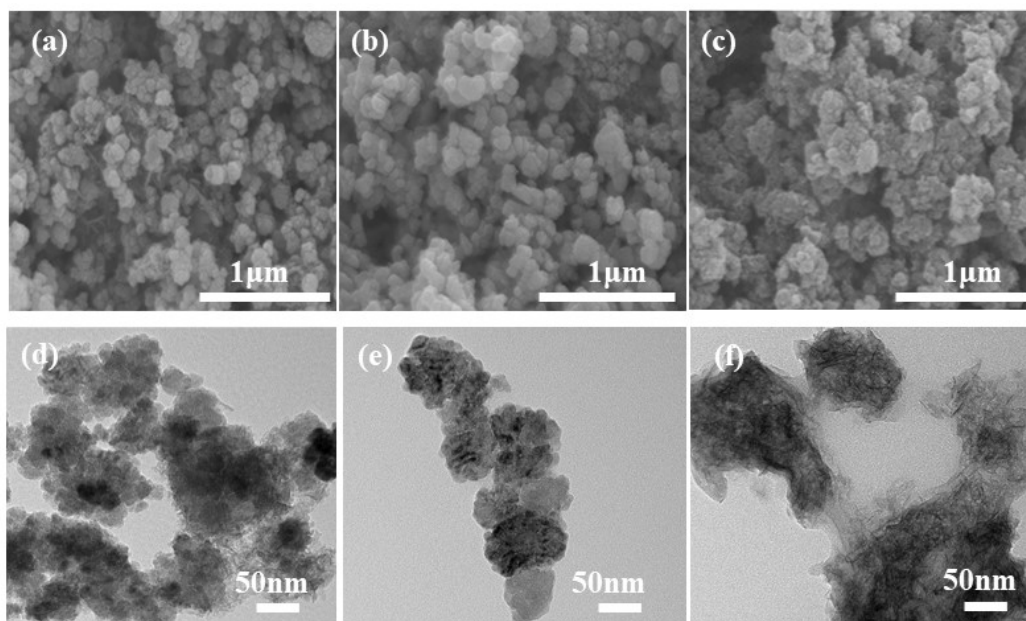

**Fig. S2** SEM images of (a) CoMn<sub>2</sub>O<sub>4</sub>(P), (b) CoMn<sub>2</sub>O<sub>4</sub>(S), (c) CoMn<sub>2</sub>O<sub>4</sub>(C) and TEM images of (d) CoMn<sub>2</sub>O<sub>4</sub>(P), (e) CoMn<sub>2</sub>O<sub>4</sub>(S), (f) CoMn<sub>2</sub>O<sub>4</sub>(C)

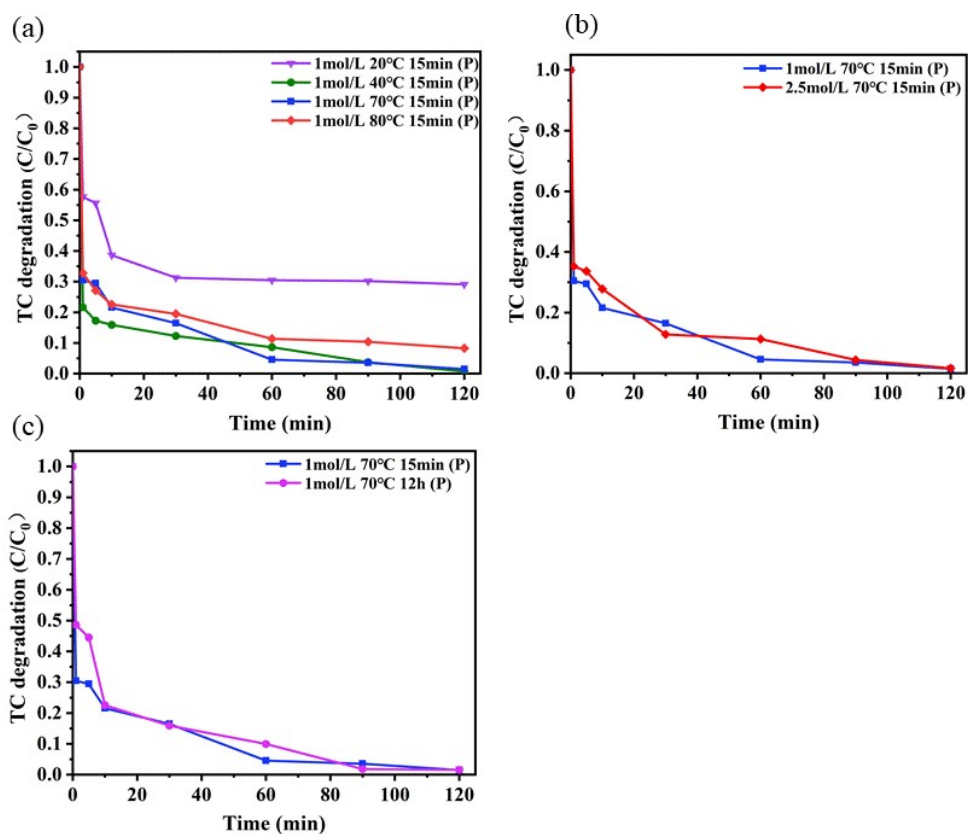

**Fig. S3** Preparation of  $\text{CoMn}_2\text{O}_4$  spinel activated PDS for tetracycline degradation by reduction of  $\text{NaBH}_4$  under different conditions:(a) Temperature (b) Concentration (c) Reaction time. Reaction conditions: [catalyst]= 0.25 g, [PMS]= 10 mL, 0.1 mol L<sup>-1</sup>, [TC] = 250 mL, 50 mg L<sup>-1</sup>, [temperature] = 30 °C.

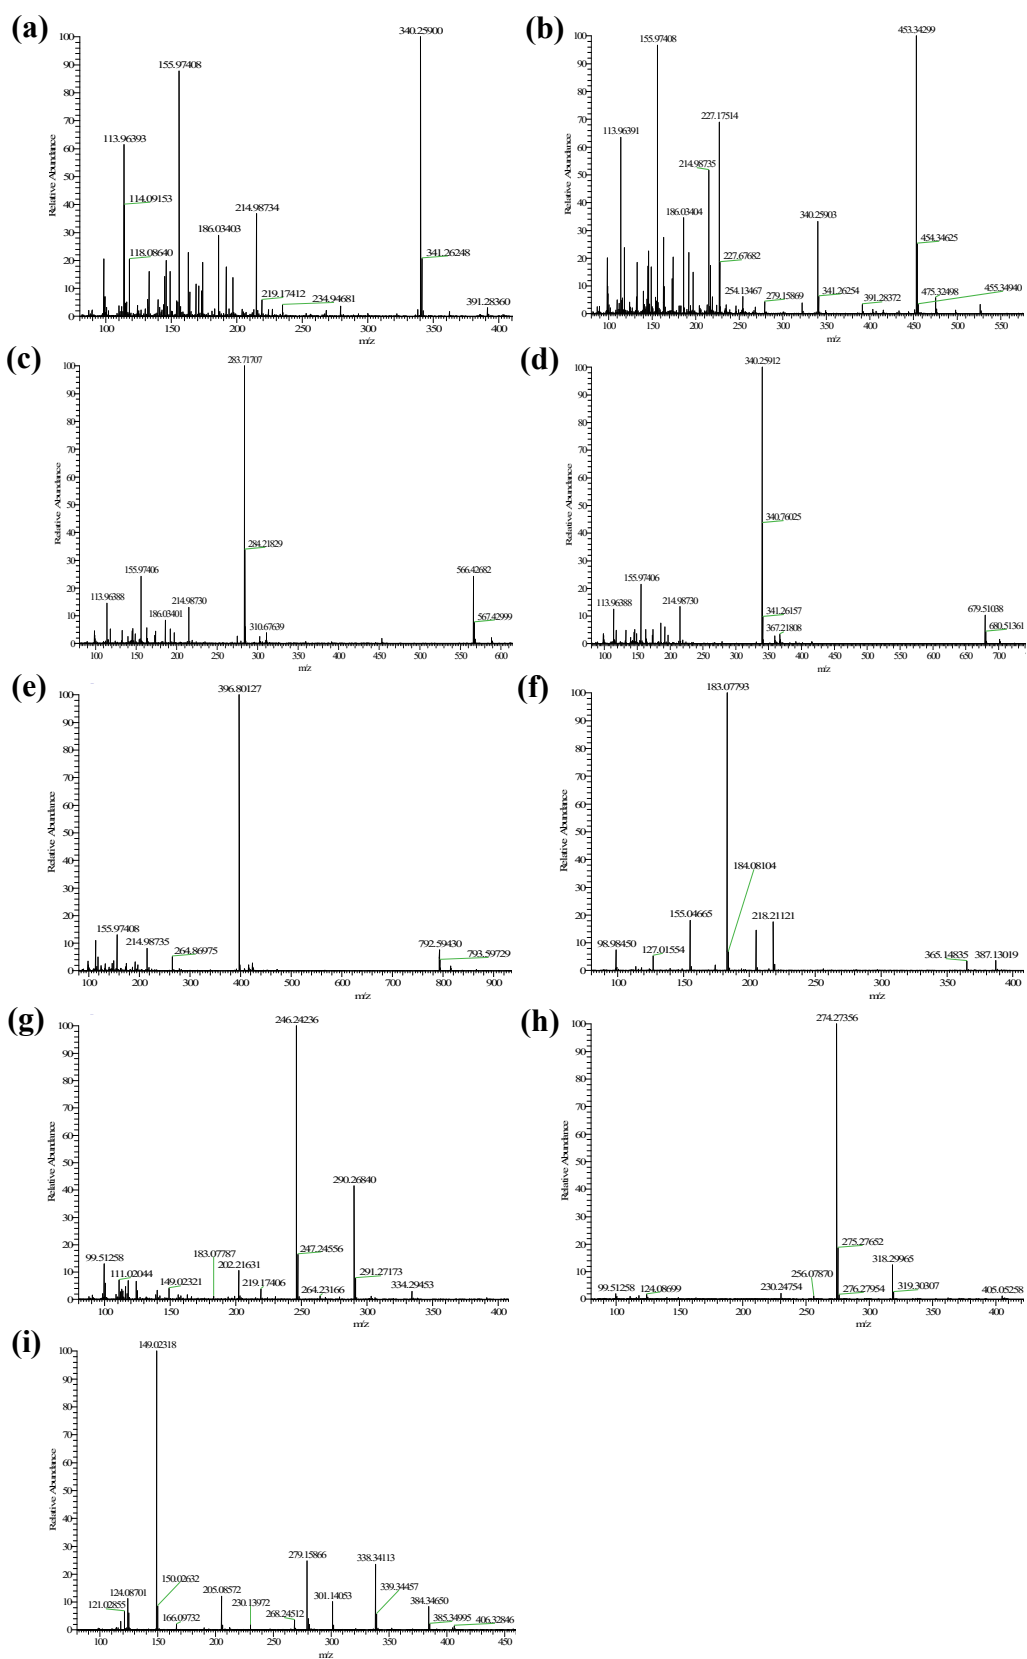

**Fig. S4 (a)~(i):** The m/z value of  $\text{CoMn}_2\text{O}_4(\text{P})$  after 30 minutes of activating PDS to degrade tetracycline.

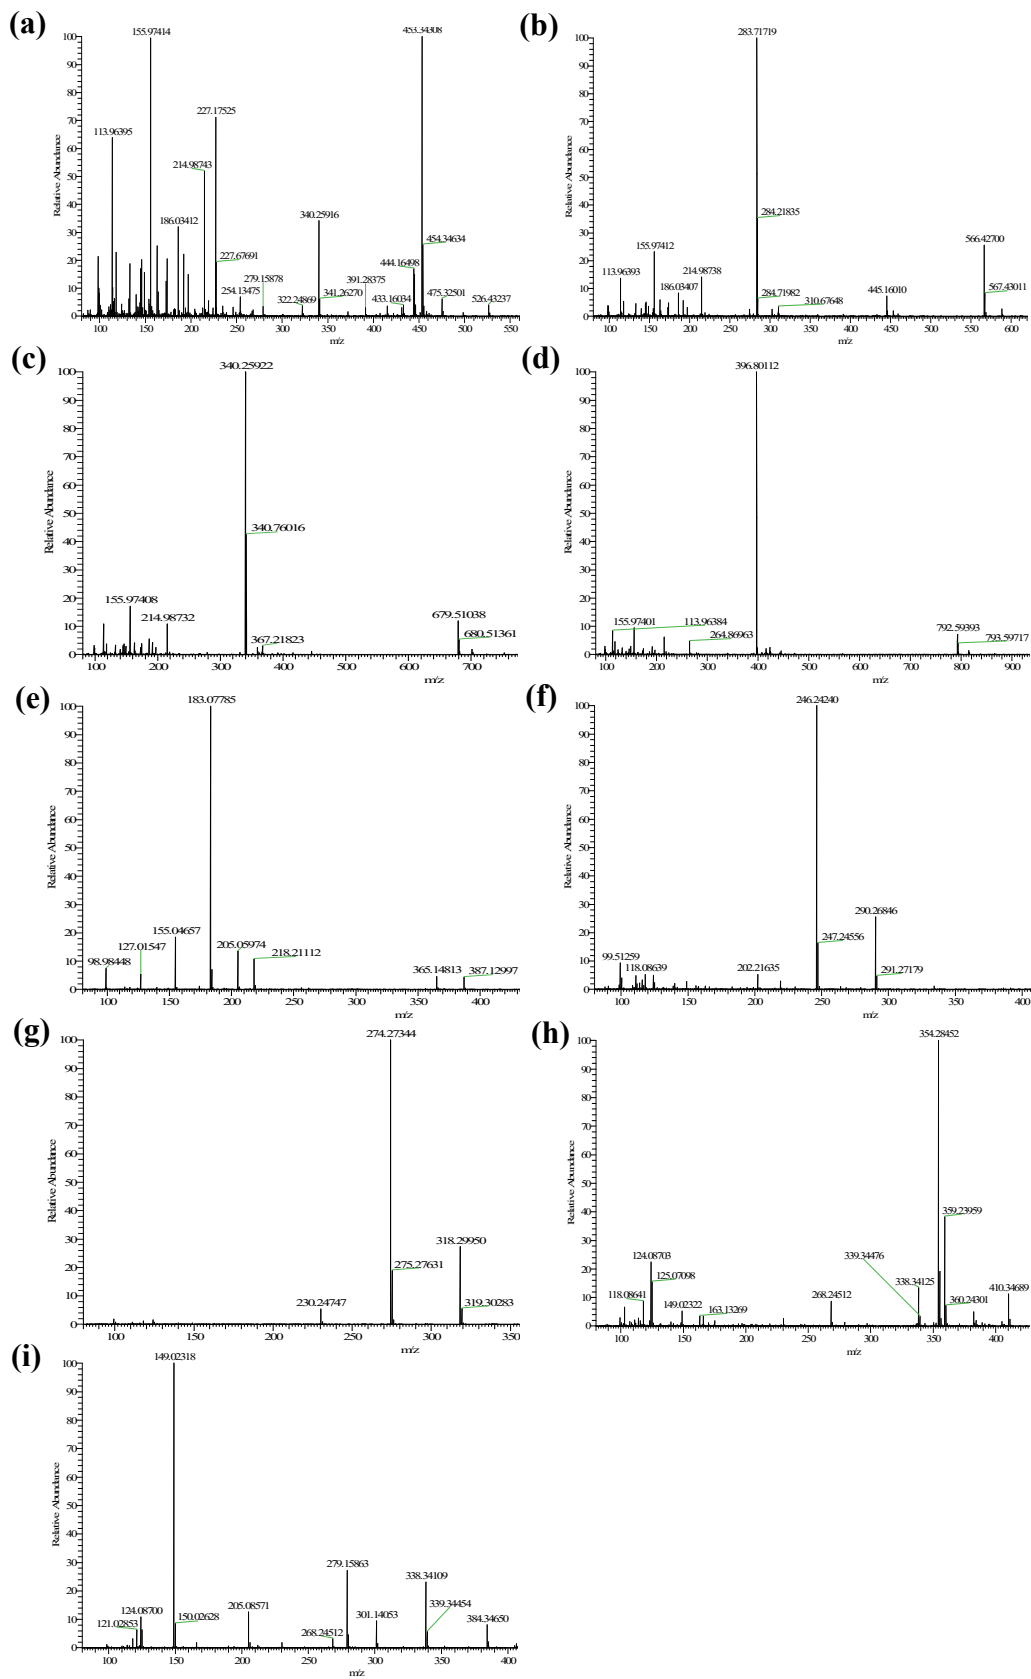

**Fig. S5 (a)~(i)** The m/z value of  $\text{CoMn}_2\text{O}_4(\text{S})$  after 30 minutes of activating PDS to degrade tetracycline.

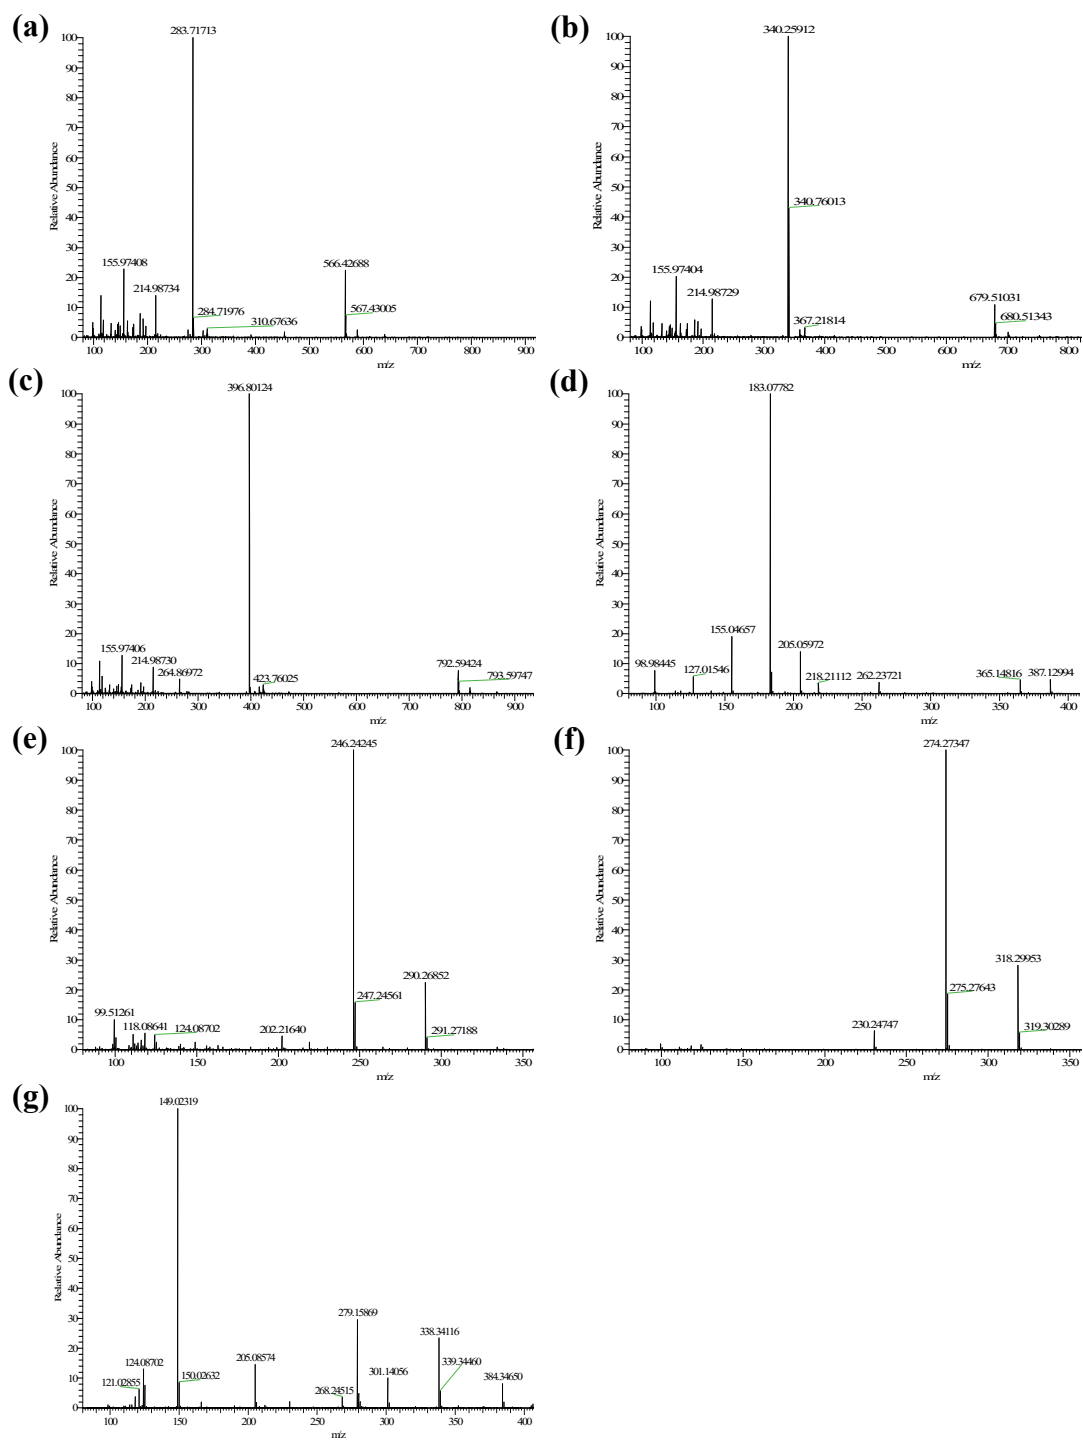

**Fig. S6** (a)~(g) The m/z value of  $\text{CoMn}_2\text{O}_4(\text{C})$  after 30 minutes of activating PDS to degrade tetracycline.

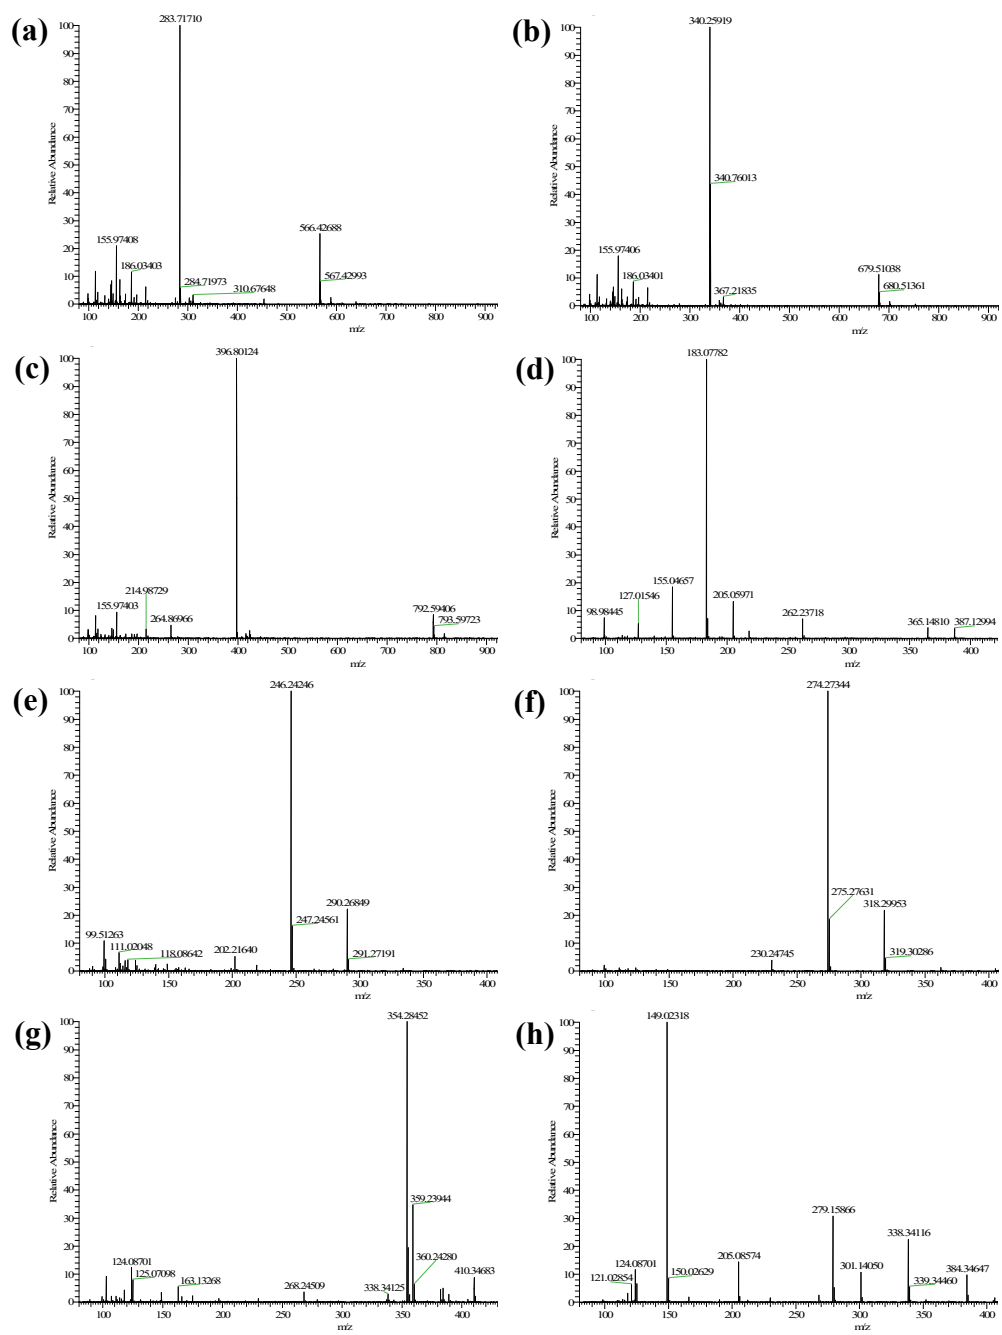

**Fig. S7** (a)~(h) The m/z value of  $\text{CoMn}_2\text{O}_4(\text{P})$  after 120 minutes of activating PDS to degrade tetracycline.

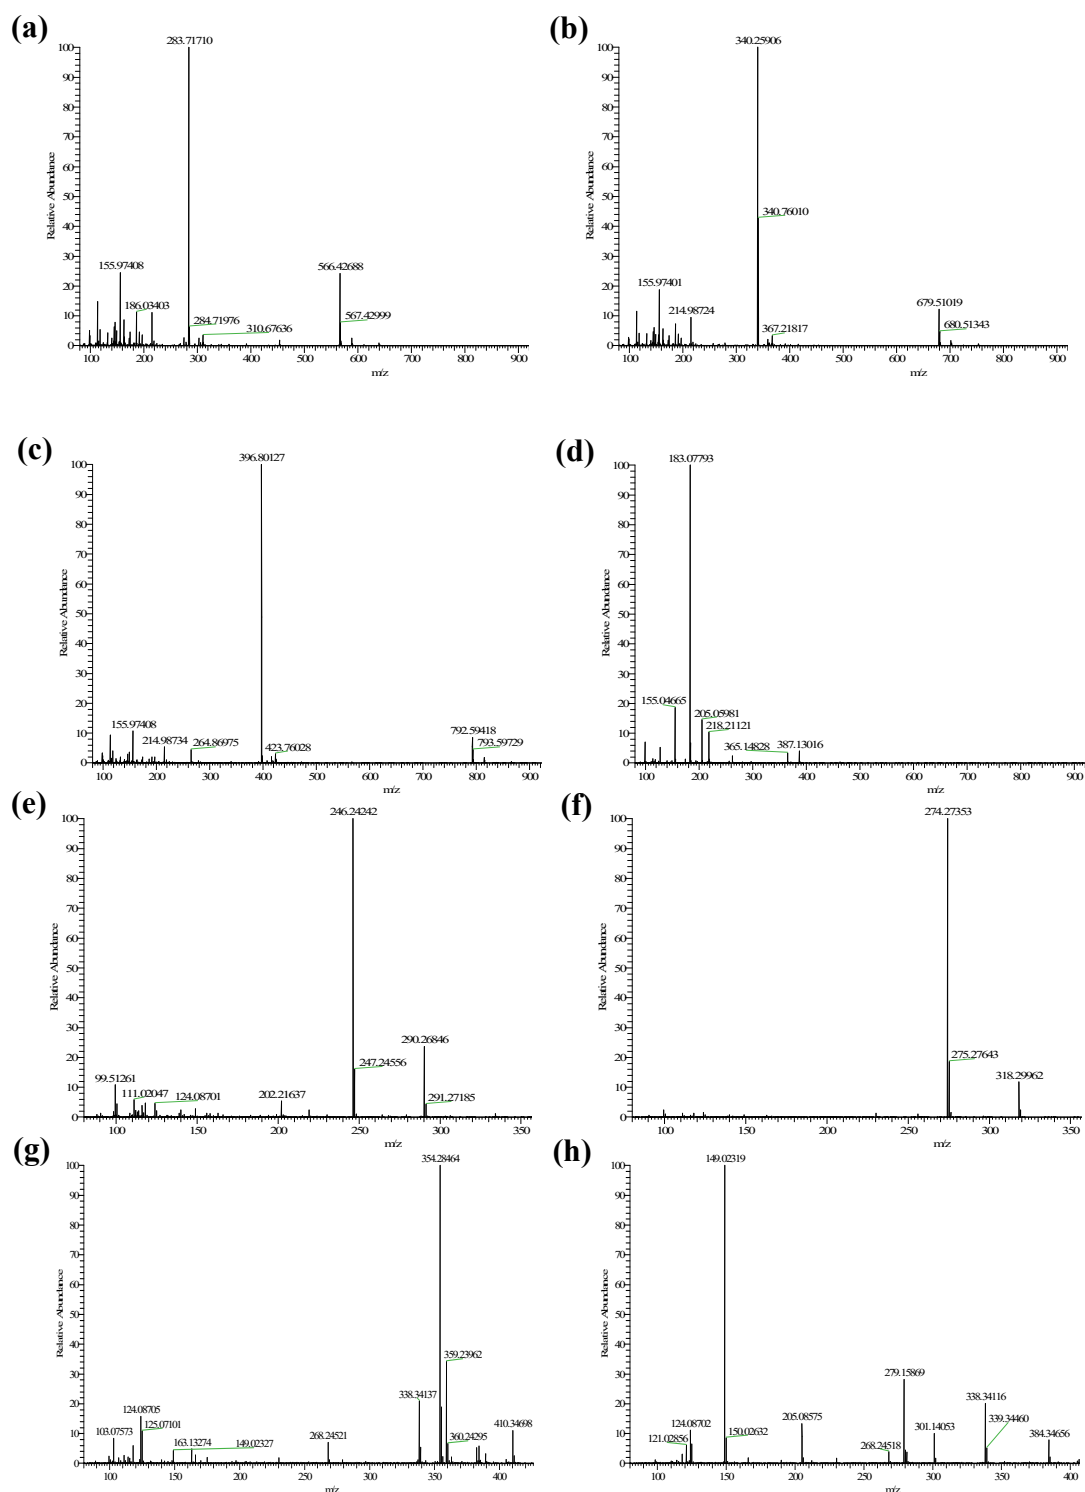

**Fig. S8** (a)~(h) The m/z value of  $\text{CoMn}_2\text{O}_4(\text{S})$  after 120 minutes of activating PDS to degrade tetracycline.



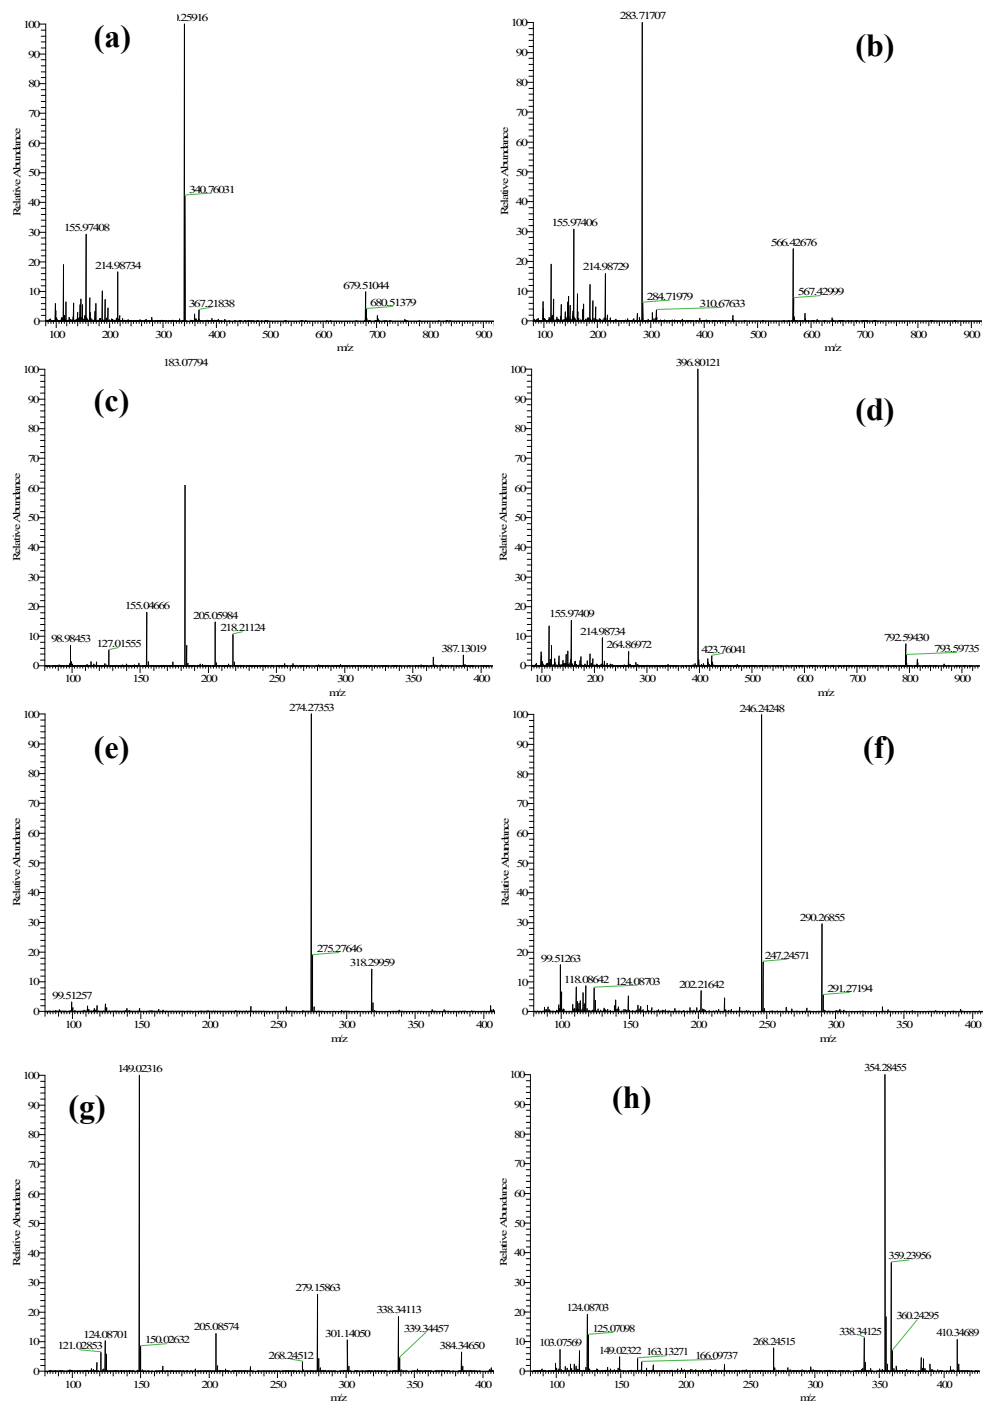

**Fig. S9** (a)~(h) The m/z value of  $\text{CoMn}_2\text{O}_4(\text{C})$  after 120 minutes of activating PDS to degrade tetracycline.

**Table S1** The pore properties of catalysts

| Sample                               | SSA<br>(m <sup>2</sup> /g) | V <sub>total</sub><br>(cm <sup>3</sup> /g) | V <sub>micro</sub><br>(cm <sup>3</sup> /g) | V <sub>meso</sub><br>(cm <sup>3</sup> /g) | Pore<br>size<br>(nm) |
|--------------------------------------|----------------------------|--------------------------------------------|--------------------------------------------|-------------------------------------------|----------------------|
| CoMn <sub>2</sub> O <sub>4</sub> (P) | 79.40                      | 0.248                                      | 0.003                                      | 0.245                                     | 11.094               |
| CoMn <sub>2</sub> O <sub>4</sub> (S) | 24.24                      | 0.098                                      | 0.001                                      | 0.097                                     | 17.095               |
| CoMn <sub>2</sub> O <sub>4</sub> (C) | 242.52                     | 0.694                                      | 0.000                                      | 0.694                                     | 26.105               |

**Table S2** XPS valence content of the synthesized catalyst before use

| Sample                               | Co 2p            |                  | Mn 2p            |                  |                  | O 1s           |                |
|--------------------------------------|------------------|------------------|------------------|------------------|------------------|----------------|----------------|
|                                      | Co <sup>2+</sup> | Co <sup>3+</sup> | Mn <sup>2+</sup> | Mn <sup>3+</sup> | Mn <sup>4+</sup> | O <sub>A</sub> | O <sub>L</sub> |
| CoMn <sub>2</sub> O <sub>4</sub> (P) | 18.0%            | 32.9%            | 16.0%            | 24.7%            | 17.6%            | 28.8%          | 71.2%          |
| CoMn <sub>2</sub> O <sub>4</sub> (S) | 17.5%            | 16.0%            | 11.8%            | 35.3%            | 19.8%            | 55.1%          | 44.9%          |
| CoMn <sub>2</sub> O <sub>4</sub> (C) | 14.9%            | 24.3%            | 24.2%            | 25.8%            | 14.4%            | 38.2%          | 61.8%          |

**Table S3** XPS valence content of the synthesized catalysts after use

| Sample                               | Co 2p            |                  | Mn 2p            |                  |                  | O 1s           |                |
|--------------------------------------|------------------|------------------|------------------|------------------|------------------|----------------|----------------|
|                                      | Co <sup>2+</sup> | Co <sup>3+</sup> | Mn <sup>2+</sup> | Mn <sup>3+</sup> | Mn <sup>4+</sup> | O <sub>A</sub> | O <sub>L</sub> |
| CoMn <sub>2</sub> O <sub>4</sub> (P) | 27.5%            | 19.0%            | 19.6%            | 22.2%            | 25.4%            | 31.7%          | 68.3%          |
| CoMn <sub>2</sub> O <sub>4</sub> (S) | 18.3%            | 18.4%            | 11.9%            | 37.5%            | 17.5%            | 49.2%          | 50.8%          |
| CoMn <sub>2</sub> O <sub>4</sub> (C) | 19.2%            | 22.7%            | 15.7%            | 26.2%            | 13.5%            | 25.8%          | 74.2%          |

**Table S4** Identification of  $\text{CoMn}_2\text{O}_4(\text{S})$ ,  $\text{CoMn}_2\text{O}_4(\text{P})$ ,  $\text{CoMn}_2\text{O}_4(\text{C})$  activated PDS to degrade TC and its possible intermediates under visible light irradiation

| No. | molecular weight | intermediates                                                                       | Samples                                                                                                                                                                     |
|-----|------------------|-------------------------------------------------------------------------------------|-----------------------------------------------------------------------------------------------------------------------------------------------------------------------------|
| TC  | 445              | 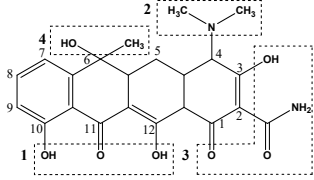   | TC                                                                                                                                                                          |
| P1  | 397              |    | $\text{CoMn}_2\text{O}_4(\text{P})$ (30min<br>120min) 、<br>$\text{CoMn}_2\text{O}_4(\text{S})$ (30min<br>120min) 、<br>$\text{CoMn}_2\text{O}_4(\text{C})$ (30min<br>120min) |
| P2  | 354              |    | $\text{CoMn}_2\text{O}_4(\text{P})$ (120min) 、<br>$\text{CoMn}_2\text{O}_4(\text{S})$ (30min<br>120min) 、<br>$\text{CoMn}_2\text{O}_4(\text{C})$ (120min)                   |
| P3  | 340 (1)          |  | $\text{CoMn}_2\text{O}_4(\text{P})$ (30min<br>120min) 、<br>$\text{CoMn}_2\text{O}_4(\text{S})$ (30min<br>120min) 、<br>$\text{CoMn}_2\text{O}_4(\text{C})$ (30min<br>120min) |
| P4  | 340 (2)          |  | $\text{CoMn}_2\text{O}_4(\text{P})$ (30min)                                                                                                                                 |
| P5  | 274              |  | $\text{CoMn}_2\text{O}_4(\text{P})$ (30min<br>120min) 、<br>$\text{CoMn}_2\text{O}_4(\text{S})$ (30min<br>120min) 、<br>$\text{CoMn}_2\text{O}_4(\text{C})$ (30min<br>120min) |
| P6  | 183              |  | $\text{CoMn}_2\text{O}_4(\text{P})$ (30min<br>120min) 、<br>$\text{CoMn}_2\text{O}_4(\text{S})$ (30min<br>120min) 、<br>$\text{CoMn}_2\text{O}_4(\text{C})$ (30min<br>120min) |

|    |     |                                                                                   |                                                                                                                                                                                         |
|----|-----|-----------------------------------------------------------------------------------|-----------------------------------------------------------------------------------------------------------------------------------------------------------------------------------------|
| P7 | 246 | 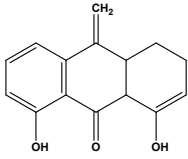 | <p>CoMn<sub>2</sub>O<sub>4</sub> (P) (30min<br/>120min) 、</p> <p>CoMn<sub>2</sub>O<sub>4</sub> (S) (30min<br/>120min) 、</p> <p>CoMn<sub>2</sub>O<sub>4</sub> (C) (30min<br/>120min)</p> |
| P8 | 283 |  | <p>CoMn<sub>2</sub>O<sub>4</sub> (P) (30min<br/>120min) 、</p> <p>CoMn<sub>2</sub>O<sub>4</sub> (S) (30min<br/>120min) 、</p> <p>CoMn<sub>2</sub>O<sub>4</sub> (C) (30min<br/>120min)</p> |
| P9 | 149 |  | <p>CoMn<sub>2</sub>O<sub>4</sub> (P) (30min<br/>120min) 、</p> <p>CoMn<sub>2</sub>O<sub>4</sub> (S) (30min<br/>120min) 、</p> <p>CoMn<sub>2</sub>O<sub>4</sub> (C) (30min<br/>120min)</p> |
